# Supplementary material for: Forty-five per cent lower acute injury incidence but no effect on overuse injury prevalence in youth floorball players (aged 12–17 years) who used an injury prevention exercise programme: two-armed parallel-group cluster randomised controlled trial
Source: PubMed Central journal article supplement (PMC7456671; doi:10.1136/bjsports-2019-101295), 2020-01-28
Supplement: bjsports-2019-101295supp001.pdf [file bjsports-2019-101295supp001.pdf]

Supplementary table 1. Details of the running warm-up programme and *Knee Control* injury prevention exercise programme (IPEP) used in the intervention group

| Exercise                        | Instructions                                                                                                                                                                                                               | Sets<br>repetitions/<br>duration |
|---------------------------------|----------------------------------------------------------------------------------------------------------------------------------------------------------------------------------------------------------------------------|----------------------------------|
| <b>Running exercises</b>        | Course consists of 6-10 pairs of parallel cones, approximately 10 m wide and 20 m long. To be performed before each training session and match. Ensure good hip-knee-foot alignment during the running exercises           | 5 min                            |
| Running                         | Straight ahead                                                                                                                                                                                                             |                                  |
| Sideways jumps                  |                                                                                                                                                                                                                            |                                  |
| Running                         | With change of direction                                                                                                                                                                                                   |                                  |
| Sideways jumps                  | Jump with body contact; shoulder to shoulder                                                                                                                                                                               |                                  |
| Running                         | Alternate forwards and backwards running, with decelerations and accelerations                                                                                                                                             |                                  |
| <b><i>Knee Control</i> IPEP</b> |                                                                                                                                                                                                                            |                                  |
| <b>One legged knee squat</b>    | Slow movement with smooth turn, stable hip with horizontal pelvic position and non-supporting foot in front of the body with slightly flexed hip and knee. Knee motion forwards in the sagittal plane, alignment with foot |                                  |
| Level A                         | Hands on hips                                                                                                                                                                                                              | 3×8-15 reps                      |
|                                 |                                                                                                                                         |                                  |
| Level B                         | Hold a stick                                                                                                                                                                                                               | 3×8-15 reps                      |
|                                 |                                                                                                                                         |                                  |

Knäkontroll®, SISU Idrottsböcker©, Sweden, 2005

Level C Dribble in front of you 3×8-15 reps

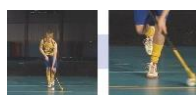

Level D Pass the ball against the court 3×8-15 reps

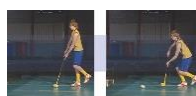

Partner exercise Both teammates stand on one leg with backs against each other. 3×8-15 reps

Hand over the floorball in different directions

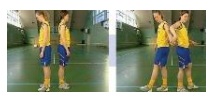


---

**Pelvic lift** Supine position; lift the pelvis from ground to neutral position while keeping the back straight

Level A Both feet on the ground and hands across the chest 3×8-15 reps

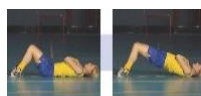

Level B Feet on a bench and hands across the chest 3×8-15 reps

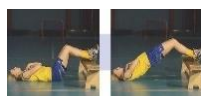

Level C One foot on the ground and the contralateral leg fixed straight, 3×8-15 reps  
arms on the ground alongside the body. Lift the pelvis and abduct the straight leg

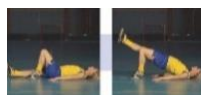

Partner exercise Supine position with feet towards each other. One foot on the 3×8-15 reps  
ground and contralateral foot against the teammates foot

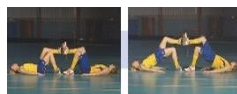


---

Knäkontroll®, SISU Idrottsböcker©, Sweden, 2005

---

|                              |                                                                                                                                                                                                                                                                   |             |
|------------------------------|-------------------------------------------------------------------------------------------------------------------------------------------------------------------------------------------------------------------------------------------------------------------|-------------|
| <b>Two legged knee squat</b> | Slow movement with smooth turn, back straight, and feet shoulder-width apart, pointing forwards and with soles in contact with the ground. Knee motion forwards in the sagittal plane, alignment with the foot. The trunk should be upright. Knee flexion to 90°. |             |
| Level A                      | Hands on hips                                                                                                                                                                                                                                                     | 3×8-15 reps |
|                              |                                                                                                                                                                                  |             |
| Level B                      | Hold stick in front of the body with straight arms                                                                                                                                                                                                                | 3×8-15 reps |
|                              |                                                                                                                                                                                  |             |
| Level C                      | Hold stick over the head with straight arms                                                                                                                                                                                                                       | 3×8-15 reps |
|                              |                                                                                                                                                                                 |             |
| Level D                      | Same as level C but continue movement and rise up on the toes after returning to the starting position and stay in the elevated position briefly                                                                                                                  | 3×8-15 reps |
|                              |                                                                                                                                                                                |             |
| Partner exercise             | Teammate stands in front of you, facing towards you. Hold two sticks, one in each hand                                                                                                                                                                            | 3×8-15 reps |
|                              |                                                                                                                                                                                |             |

---

|                  |                                                                                                                                                                                                                                                                                                                                                                      |           |
|------------------|----------------------------------------------------------------------------------------------------------------------------------------------------------------------------------------------------------------------------------------------------------------------------------------------------------------------------------------------------------------------|-----------|
| <b>The bench</b> | Lift body and keep it in a straight line, with no hip flexion/extension. Elbows placed beneath the shoulders with 90° flexion of the shoulders and elbows                                                                                                                                                                                                            |           |
| Level A          | Prone position; support on knees and on lower arms with elbows kept beneath the shoulders                                                                                                                                                                                                                                                                            | 15-30 s   |
|                  |                                                                                                                                                                                                                                                                                                                                                                      |           |
| Level B          | Same as level A but with support on the tip of the feet                                                                                                                                                                                                                                                                                                              | 15-30 s   |
|                  |                                                                                                                                                                                                                                                                                                                                                                      |           |
| Level C          | Same as level B, but raise one foot at a time up and down; alternate sides                                                                                                                                                                                                                                                                                           | 15-30 s   |
|                  |                                                                                                                                                                                                                                                                                                                                                                      |           |
| Level D          | Lie sideways with support on the foot and lower arm with the elbow kept beneath the shoulder and the other hand on the hip; lift the hip off the ground and stay briefly in that position with good control before slowly returning to the starting position. Elbow under the shoulder with 90° shoulder abduction and 90° elbow flexion. No hip abduction/adduction | 5-10 reps |
|                  |                                                                                                                                                                                                                                                                                                                                                                      |           |
| Partner exercise | Same as level A but teammate face to face. Pass a floorball with the hand                                                                                                                                                                                                                                                                                            | 15-30 s   |
|                  |                                                                                                                                                                                                                                                                                                                                                                      |           |

---

|                  |                                                                                                                                                                                                                                                                                                                               |             |
|------------------|-------------------------------------------------------------------------------------------------------------------------------------------------------------------------------------------------------------------------------------------------------------------------------------------------------------------------------|-------------|
| <b>The lunge</b> | Take a deep step with a marked knee lift and soft landing; the rear knee should not touch the ground. Keep good knee-over-foot alignment. Trunk control maintained with minimum lateral movement. Stable hip with horizontal pelvic position. Forward knee flexed to 90°. Foot placed in the sagittal plane pointing forwards |             |
| Level A          | Hands on the hips; move forwards with each step                                                                                                                                                                                                                                                                               | 3×8-15 reps |
|                  |                                                                                                                                                                                                                                              |             |
| Level B          | Hold the stick in front of the body; move forwards with each step                                                                                                                                                                                                                                                             | 3×8-15 reps |
|                  |                                                                                                                                                                                                                                              |             |
| Level C          | Same as level B but continue the movement and rise up on the toes between each lunge                                                                                                                                                                                                                                          | 3×8-15 reps |
|                  |                                                                                                                                                                                                                                            |             |
| Level D          | Same as level B, rotate the upper body while stepping forwards and position the stick laterally to the front leg; move forwards with each step and alternate sides                                                                                                                                                            | 3×8-15 reps |
|                  |                                                                                                                                                                                                                                            |             |
| Partner exercise | Teammate stands in front of you 5 m away; pass the floorball, perform a forward lunge, and receive a pass back                                                                                                                                                                                                                | 3×8-15 reps |
|                  |                                                                                                                                                                                                                                            |             |

---

---

|                     |                                                                                                                                                                                                                                                                                       |             |
|---------------------|---------------------------------------------------------------------------------------------------------------------------------------------------------------------------------------------------------------------------------------------------------------------------------------|-------------|
| <b>Jump/landing</b> | Jump with a controlled and soft landing; stay briefly in the landing position. Keep good knee-over-foot alignment. Trunk control maintained with minimal motion. Knee control maintained with minimal wobble sideways. Foot placed in the sagittal plane pointing forwards at landing |             |
| Level A             | Stand on one leg with the knee slightly bent and hands on the hips; make a short forwards jump and land on the same foot; then jump backwards to the starting position                                                                                                                | 3×8-15 reps |
|                     |                                                                                                                                                                                                      |             |
| Level B             | Stand on both feet shoulder-width apart and hold a stick; make two forward jumps and land on one foot after the third jump with a controlled and soft landing; alternate sides                                                                                                        | 3×8-15 reps |
|                     |                                                                                                                                                                                                    |             |
| Level C             | Same as level B but rotate the body 90° before landing on one leg; alternate sides                                                                                                                                                                                                    | 3×5 reps    |
|                     |                                                                                                                                                                                                    |             |
| Level D             | Sideways jump on one foot and dribble with a ball and stick in front of you                                                                                                                                                                                                           | 3×5 reps    |
|                     |                                                                                                                                                                                                    |             |

Partner exercise      Teammate stands in front of you approximately 5 m away; make      3×8-15 reps  
sideways jump on one foot and pass the floorball to your  
teammate. Jump back to the starting position and receive a pass  
back

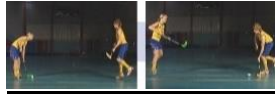

Knäkontroll®, SISU Idrottsböcker©, Sweden, 2005
