# Supplementary material for: Forty-five per cent lower acute injury incidence but no effect on overuse injury prevalence in youth floorball players (aged 12–17 years) who used an injury prevention exercise programme: two-armed parallel-group cluster randomised controlled trial
Source: PubMed Central journal article supplement (PMC7456671; doi:10.1136/bjsports-2019-101295), 2020-01-28

Supplementary figure 1. Flowchart of the weekly survey.

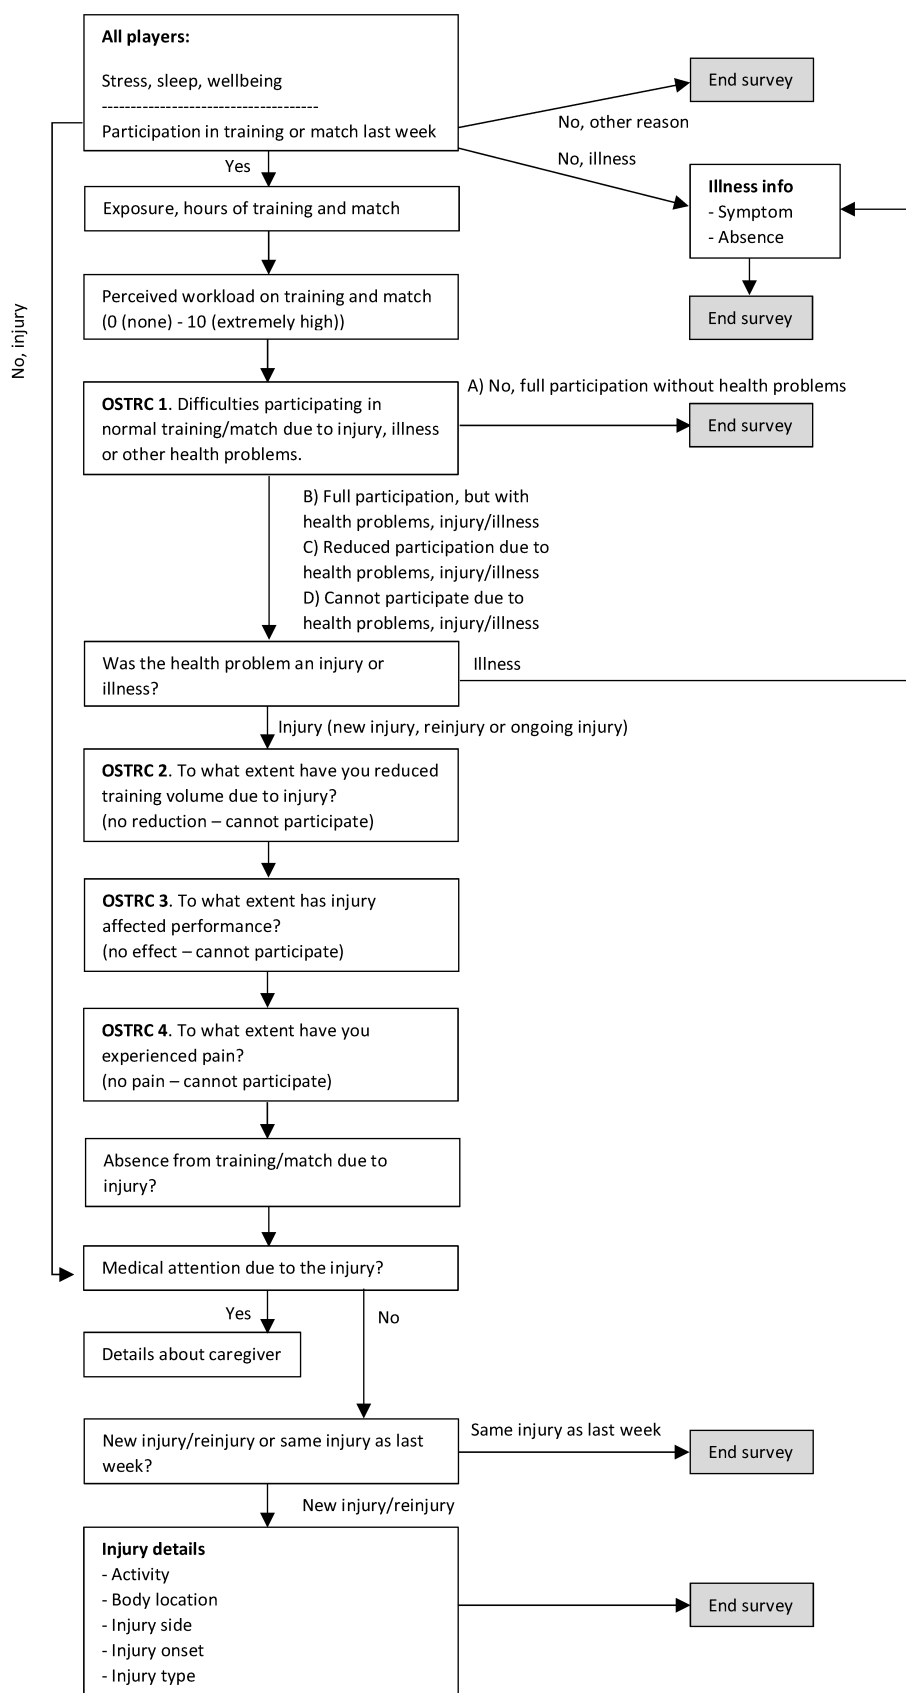

Supplement: bjsports-2019-101295supp002.pdf [file bjsports-2019-101295supp002.pdf]
