# Supplementary material for: Forty-five per cent lower acute injury incidence but no effect on overuse injury prevalence in youth floorball players (aged 12–17 years) who used an injury prevention exercise programme: two-armed parallel-group cluster randomised controlled trial
Source: PubMed Central journal article supplement (PMC7456671; doi:10.1136/bjsports-2019-101295), 2020-01-28
Supplement: bjsports-2019-101295supp003.pdf [file bjsports-2019-101295supp003.pdf]

Supplementary table 2. Baseline characteristics for included players (n=471)

|                                                                   | Intervention     |                   |                 | Control          |                  |                 |
|-------------------------------------------------------------------|------------------|-------------------|-----------------|------------------|------------------|-----------------|
|                                                                   | Total<br>(n=301) | Female<br>(n=107) | Male<br>(n=194) | Total<br>(n=170) | Female<br>(n=35) | Male<br>(n=135) |
| Age (years), mean (SD)                                            | 13.6 (1.1)       | 13.8 (1.3)        | 13.5 (0.9)      | 13.2 (1.3)       | 13.6 (1.9)       | 13.1 (1.2)      |
| Floorball experience (years),<br>mean (SD)                        | 5.1 (2.3)        | 4.4 (2.4)         | 5.5 (2.1)       | 4.6 (2.4)        | 5.1 (2.7)        | 4.4 (2.3)       |
| Participating in other sports<br>(yes), n (%)*                    | 183 (61)         | 57 (53)           | 126 (65)        | 106(62)          | 23 (66)          | 83 (61)         |
| Menarche (yes), n (%)†                                            |                  | 75 (70)           |                 |                  | 18 (51)          |                 |
| Sports profile in school (yes),<br>n (%)                          | 61 (20)          | 14 (13)           | 47 (24)         | 17 (10)          | 2 (6)            | 15 (11)         |
| Previous experience of using<br><i>Knee Control</i> IPEP, n, (%)‡ |                  |                   |                 |                  |                  |                 |
| Regularly                                                         | 44 (16)          | 19 (19)           | 25 (14)         | 17 (11)          | 2 (7)            | 15 (12)         |
| Sporadically                                                      | 81 (29)          | 28 (28)           | 53 (29)         | 41 (27)          | 13 (42)          | 28 (23)         |
| No                                                                | 158 (56)         | 52 (52)           | 106 (58)        | 96 (62)          | 16 (52)          | 80 (65)         |

\*Currently participating in other sports missing for 13 players in the intervention group and 14 in the control group.

†Menarche missing for 3 girls in the intervention group and 2 in the control group.

‡Previous experience of using *Knee Control* IPEP missing for 18 players in the intervention group and 16 in the control group.
